# Supplementary material for: Boron additive passivated carbonate electrolytes for stable cycling of 5 V lithium–metal batteries
Source: Royal Society of Chemistry journal article supplement (doi:10.1039/c8ta09380f), 2018-11-28
Supplement: c8ta09380f1.pdf [file c8ta09380f1.pdf]

## Supplementary Materials

### **Boron Additives Passivated Carbonate Electrolytes for the Stable Cycling of 5 V Lithium Metal Batteries**

Hongyun Yue<sup>1</sup>, Yange Yang<sup>1</sup>, Yan Xiao<sup>1</sup>, Zhiyuan Dong<sup>1</sup>, Shuguo Cheng<sup>5</sup>, Yanhong Yin<sup>1</sup>,  
Chen Ling<sup>1</sup>, Weiguang Yang<sup>2,\*</sup>, Yanhao Yu<sup>3,\*</sup>, and Shuting Yang<sup>1,4,\*</sup>

<sup>1</sup> National & Local Engineering Laboratory for Motive Power and Key Materials, College of Chemistry and Chemical Engineering, Henan Normal University, Xinxiang, 453007, P. R. China

<sup>2</sup> Department of Electronic Information Materials, School of Materials Science and Engineering, Shanghai University, Shanghai, 200444, P. R. China

<sup>3</sup> John A. Paulson School of Engineering and Applied Sciences, Harvard University, Cambridge, MA, 02138, USA.

<sup>4</sup> The Battery Research Institute of Henan, 453007, P. R. China

<sup>5</sup> Henan HuaRui Advanced Materials Technology Co. Ltd., Xinxiang, 453007, P. R. China

\*Email: [shutingyang@foxmail.com](mailto:shutingyang@foxmail.com) (SY); [yanhaoyu@seas.harvard.edu](mailto:yanhaoyu@seas.harvard.edu) (YY);  
[wgyang@shu.edu.cn](mailto:wgyang@shu.edu.cn) (WY)

## Supplementary Figures

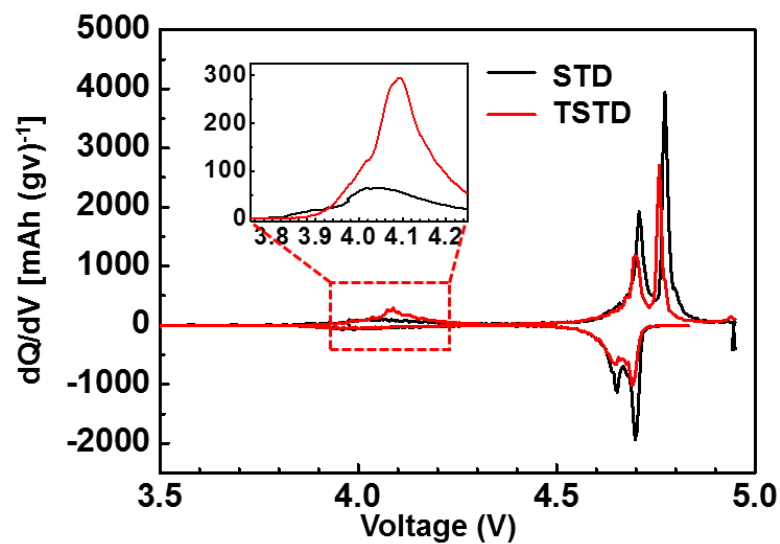

**Figure S1.** Differential capacity vs. voltage curves of LNMO/Li battery with STD and TSTD electrolytes during the first cycle.

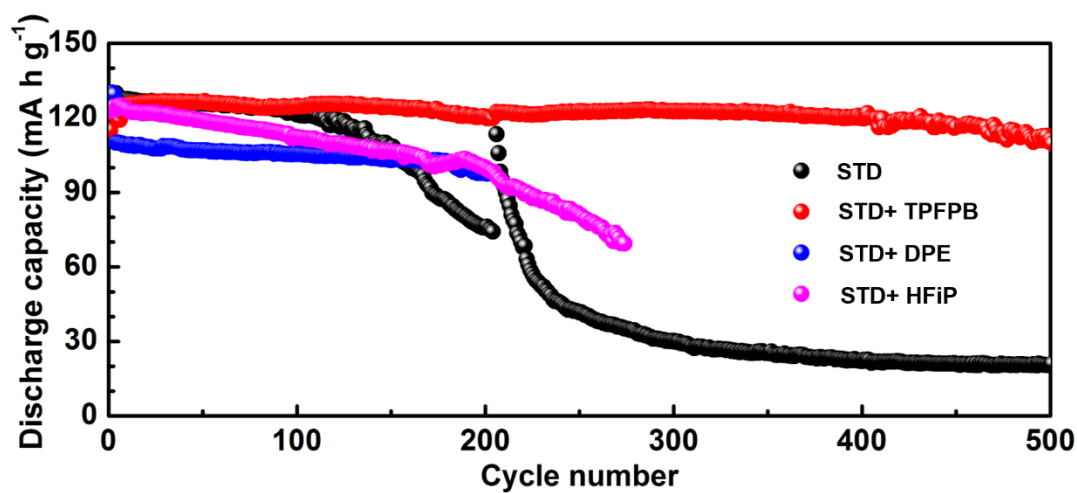

**Figure S2.** The comparison of batteries cycling performance with different kinds of additives.

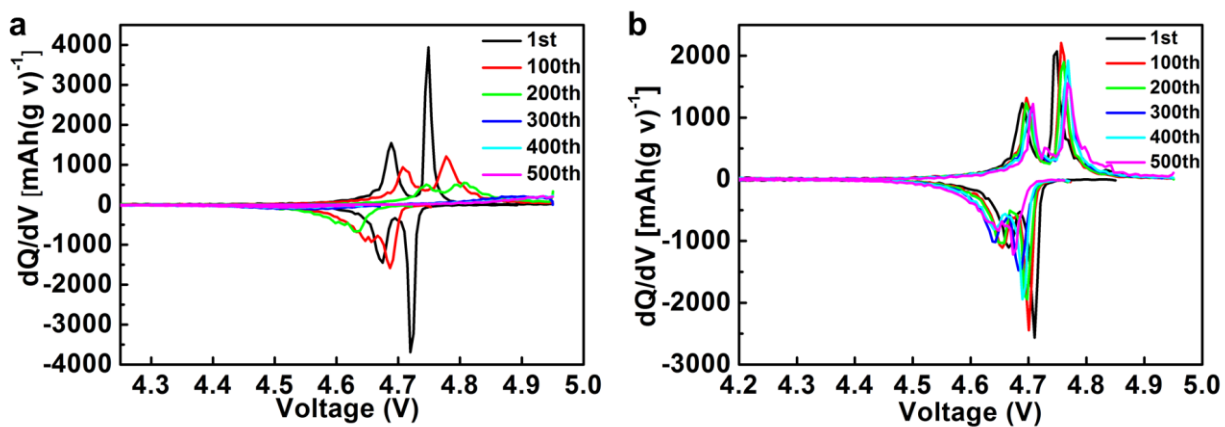

**Figure S3.** Differential capacity vs. voltage curves of cells in electrolyte (a) without (b) and with TPFPB in different cycles.

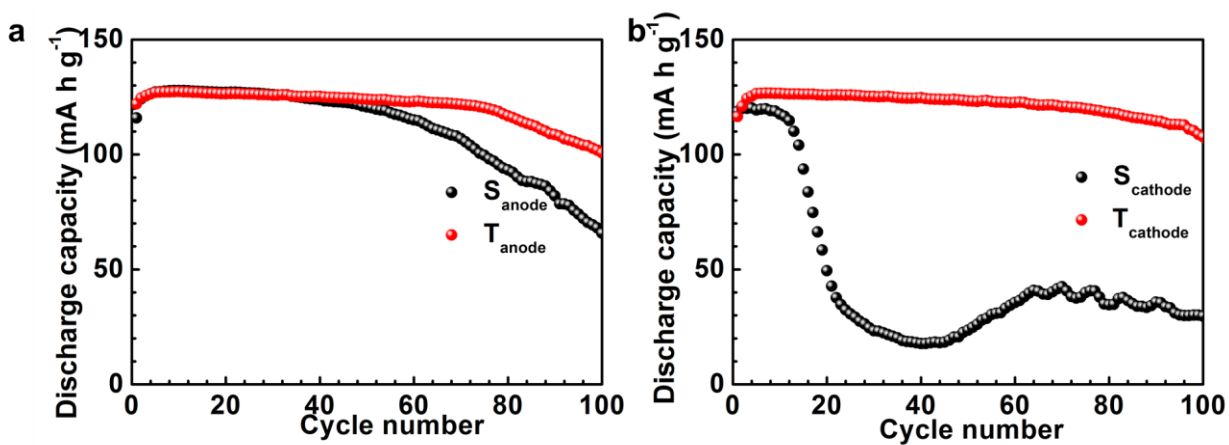

**Figure S4.** The cycling performance of reassembled cells with (a)  $S_{\text{anode}}$ ,  $T_{\text{anode}}$  and (b)  $S_{\text{cathode}}$ ,  $T_{\text{cathode}}$ .

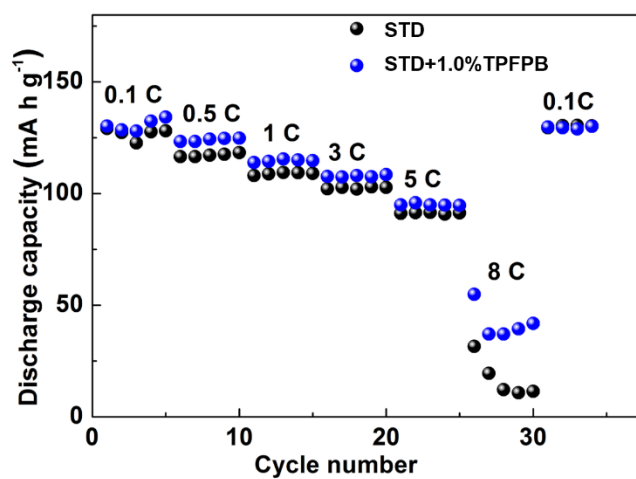

**Figure S5.** Rate performance of Li/LNMO batteries with various electrolytes.

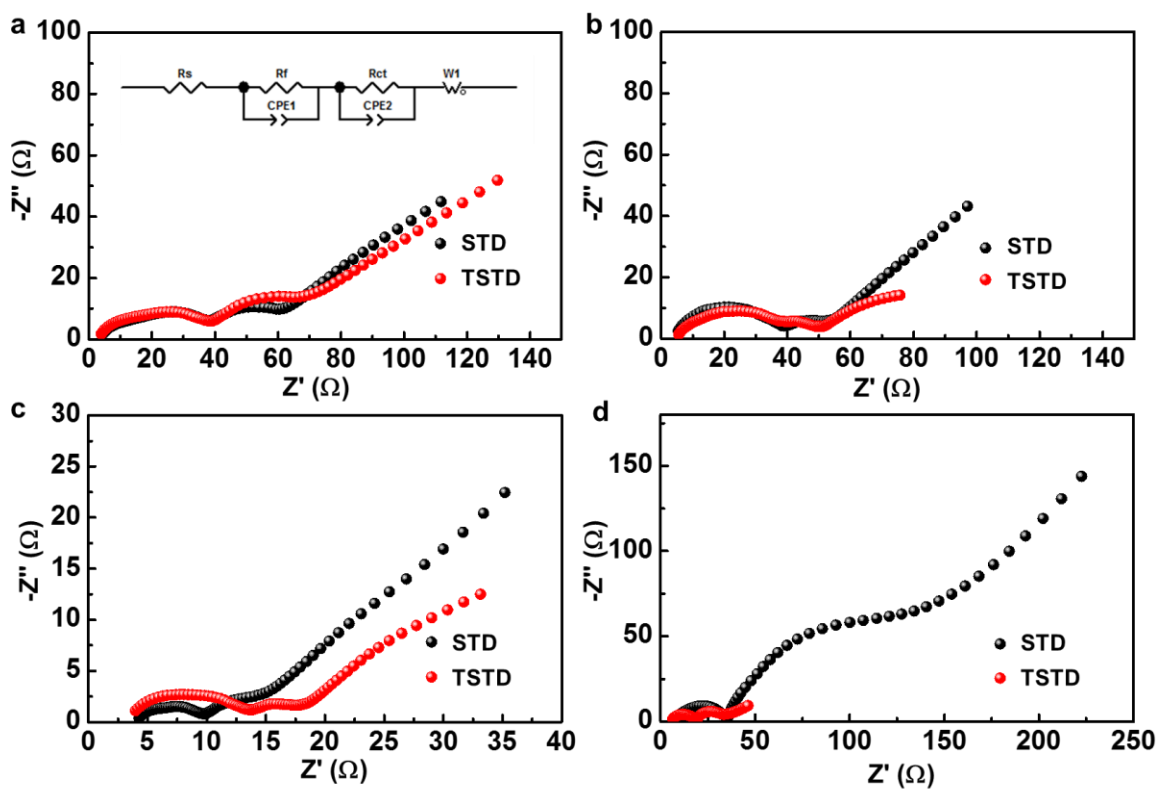

**Figure S6.** Electrochemical impedance spectra of Li/LiNi<sub>0.5</sub>Mn<sub>1.5</sub>O<sub>4</sub> cells STD and TSTD electrolytes (a) after initial 1 cycle, (b) 3 cycles, (c) 5 cycles and (d) 200 cycles.

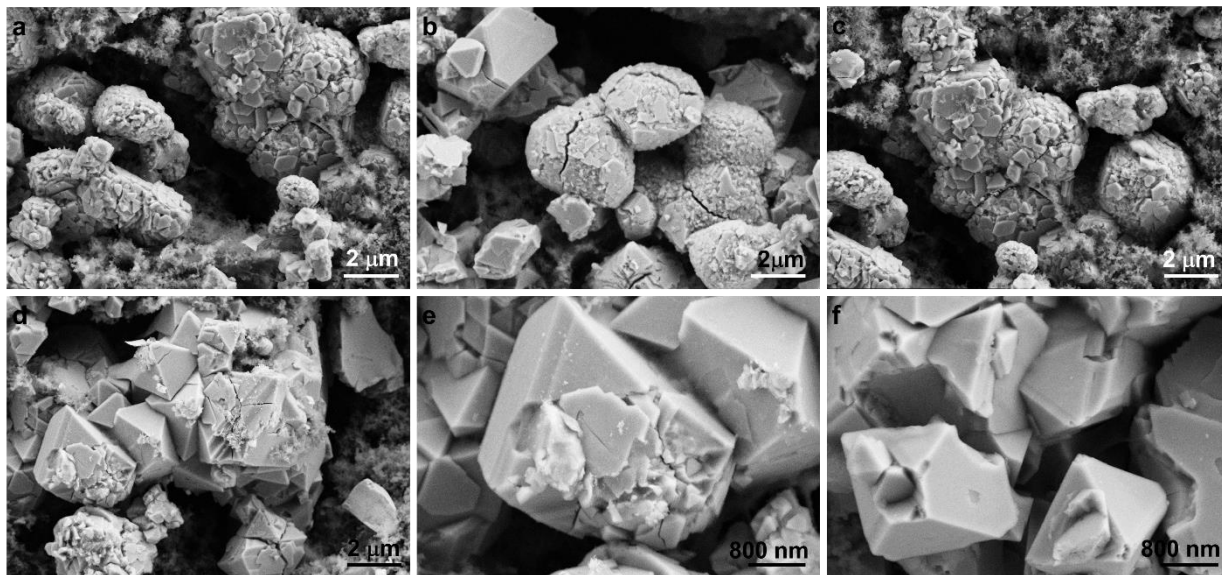

**Figure S7.** Different area data points of LNMO electrode after the 200<sup>th</sup> cycle with STD electrolyte.

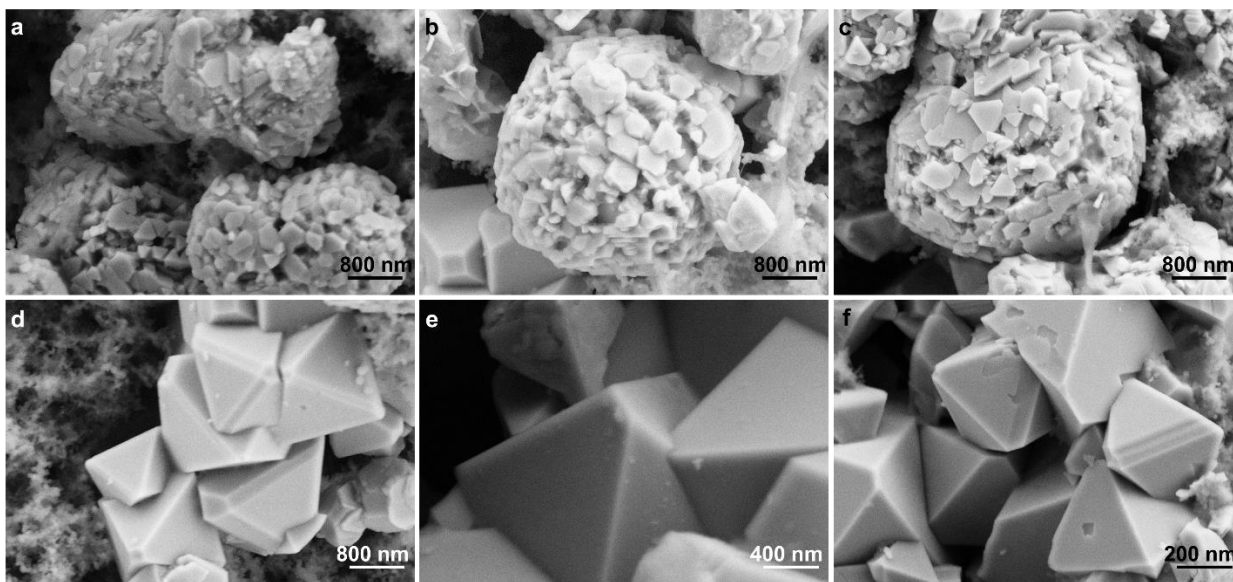

**Figure S8.** Different area data points of LNMO electrode after the 200<sup>th</sup> cycle with TSTD electrolyte.

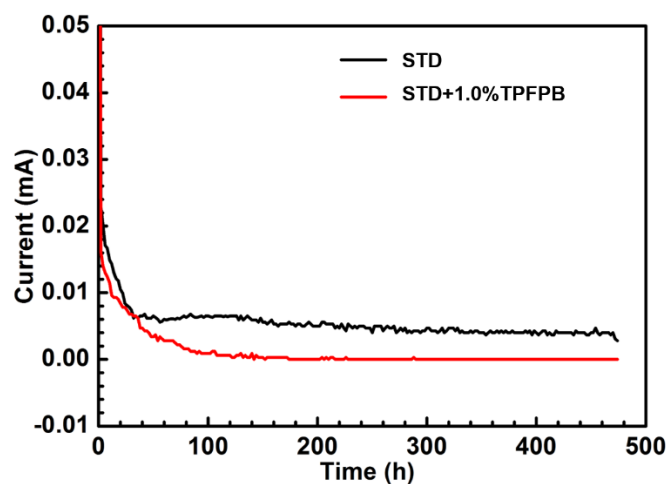

**Figure S9.** Chronoamperometric responses of LNMO/Li batteries in baseline and TSTD electrolytes.

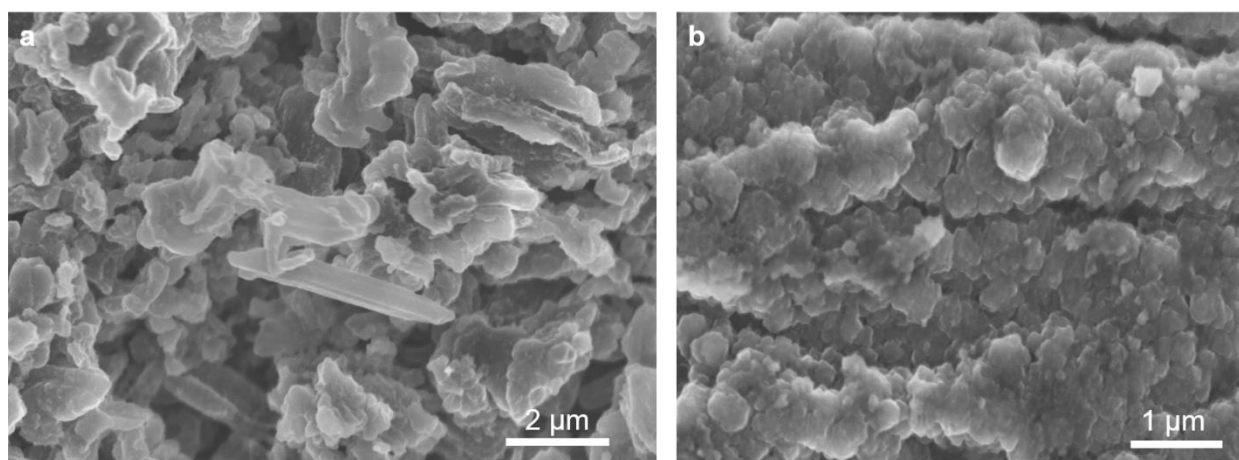

**Figure S10.** SEM images of anode after 200 cycles in (a) STD and (b) TSTD electrolytes.
